# Supplementary material for: Synthesis of Amorphous and Various Phase-Pure Nanoparticles of Nickel Phosphide with Uniform Sizes via a Trioctylphosphine-Mediated Pathway
Source: PubMed Central journal article supplement (PMC11462502; doi:10.1021/acs.inorgchem.4c03334), 2024-09-27
Supplement: ic4c03334_si_001.pdf [file ic4c03334_si_001.pdf]

## Supporting Information

### **Synthesis of Amorphous and Various Phase-Pure Nanoparticles of Nickel Phosphide with Uniform Sizes *via* a Trioctylphosphine-Mediated Pathway**

David Thompson<sup>a</sup>, Adam S. Hoffman<sup>b</sup>, Zachary R. Mansley<sup>c</sup>, Sarah York<sup>a</sup>, Feng Wang<sup>a</sup>, Yimei Zhu<sup>d</sup>, Simon R. Bare<sup>b</sup>, and Jingyi Chen<sup>a\*</sup>

*<sup>a</sup>Department of Chemistry and Biochemistry, University of Arkansas, Fayetteville, AR 72701, United States*

*<sup>b</sup>Stanford Synchrotron Radiation Lightsource, SLAC National Accelerator Laboratory, Menlo Park, CA 94025, United States*

*<sup>c</sup>Interdisciplinary Science Department, Brookhaven National Laboratory, Upton, NY 11973, United States*

*<sup>d</sup>Condensed Matter Physics and Materials Science Department, Brookhaven National Laboratory, Upton, NY 11973, United States*

\*Email: [chenj@uark.edu](mailto:chenj@uark.edu)

**Table S1.** Summary of ICP-MS results for the amorphous Ni<sub>x</sub>P<sub>y</sub> nanoparticles synthesized under different conditions by varying the amount of TOP used and the reaction time.

| Amount of TOP<br>(mL/mmol) | Reaction time<br>(min) | Ni<br>(mol%) | P<br>(mol%) |
|----------------------------|------------------------|--------------|-------------|
| 0.05/0.11                  | 10                     | -            | -           |
|                            | 30                     | 72           | 28          |
|                            | 60                     | 99           | 1           |
|                            | 120                    | 98           | 2           |
| 0.20/0.45                  | 10                     | 98           | 2           |
|                            | 30                     | 98           | 2           |
|                            | 60                     | 95           | 5           |
|                            | 120                    | 96           | 4           |
| 0.50/1.12                  | 10                     | 94 ± 1       | 6 ± 1       |
|                            | 30                     | 87 ± 8       | 13 ± 8      |
|                            | 60                     | 86 ± 10      | 14 ± 10     |
|                            | 120                    | 74 ± 3       | 26 ± 3      |
| 1.00/2.24                  | 10                     | 77 ± 6       | 23 ± 6      |
|                            | 30                     | 75 ± 4       | 25 ± 4      |
|                            | 60                     | 72 ± 3       | 28 ± 7      |
|                            | 120                    | 73 ± 3       | 27 ± 7      |

**Table S2.** Summary of the particle size measured from TEM and the formula derived from ICP-MS results for each sample.

| Amount of TOP<br>(mL/mmol) | Reaction time<br>(min) | Size from TEM<br>(nm) | Formula derived from<br>ICP-MS   |
|----------------------------|------------------------|-----------------------|----------------------------------|
| 0.05/0.11                  | 10                     | -                     | -                                |
|                            | 30                     | 7.7 ± 1.0             | Ni <sub>72</sub> P <sub>28</sub> |
|                            | 60                     | 48.4 ± 8.3            | Ni <sub>99</sub> P <sub>1</sub>  |
|                            | 120                    | 52.8 ± 8.8            | Ni <sub>98</sub> P <sub>2</sub>  |
| 0.20/0.45                  | 10                     | 31.6 ± 3.7            | Ni <sub>98</sub> P <sub>2</sub>  |
|                            | 30                     | 29.3 ± 2.9            | Ni <sub>98</sub> P <sub>2</sub>  |
|                            | 60                     | 33.7 ± 5.4            | Ni <sub>95</sub> P <sub>5</sub>  |
|                            | 120                    | 39.8 ± 3.9            | Ni <sub>96</sub> P <sub>4</sub>  |
| 0.50/1.12                  | 10                     | 21.8 ± 2.5            | Ni <sub>94</sub> P <sub>6</sub>  |
|                            | 30                     | 21.0 ± 3.3            | Ni <sub>87</sub> P <sub>13</sub> |
|                            | 60                     | 20.4 ± 3.8            | Ni <sub>86</sub> P <sub>14</sub> |
|                            | 120                    | 12.0 ± 1.0            | Ni <sub>76</sub> P <sub>24</sub> |
| 1.00/2.24                  | 10                     | 10.0 ± 1.0            | Ni <sub>74</sub> P <sub>26</sub> |
|                            | 30                     | 12.5 ± 1.0            | Ni <sub>72</sub> P <sub>28</sub> |
|                            | 60                     | 12.7 ± 1.0            | Ni <sub>72</sub> P <sub>28</sub> |
|                            | 120                    | 15.7 ± 2.0            | Ni <sub>75</sub> P <sub>25</sub> |

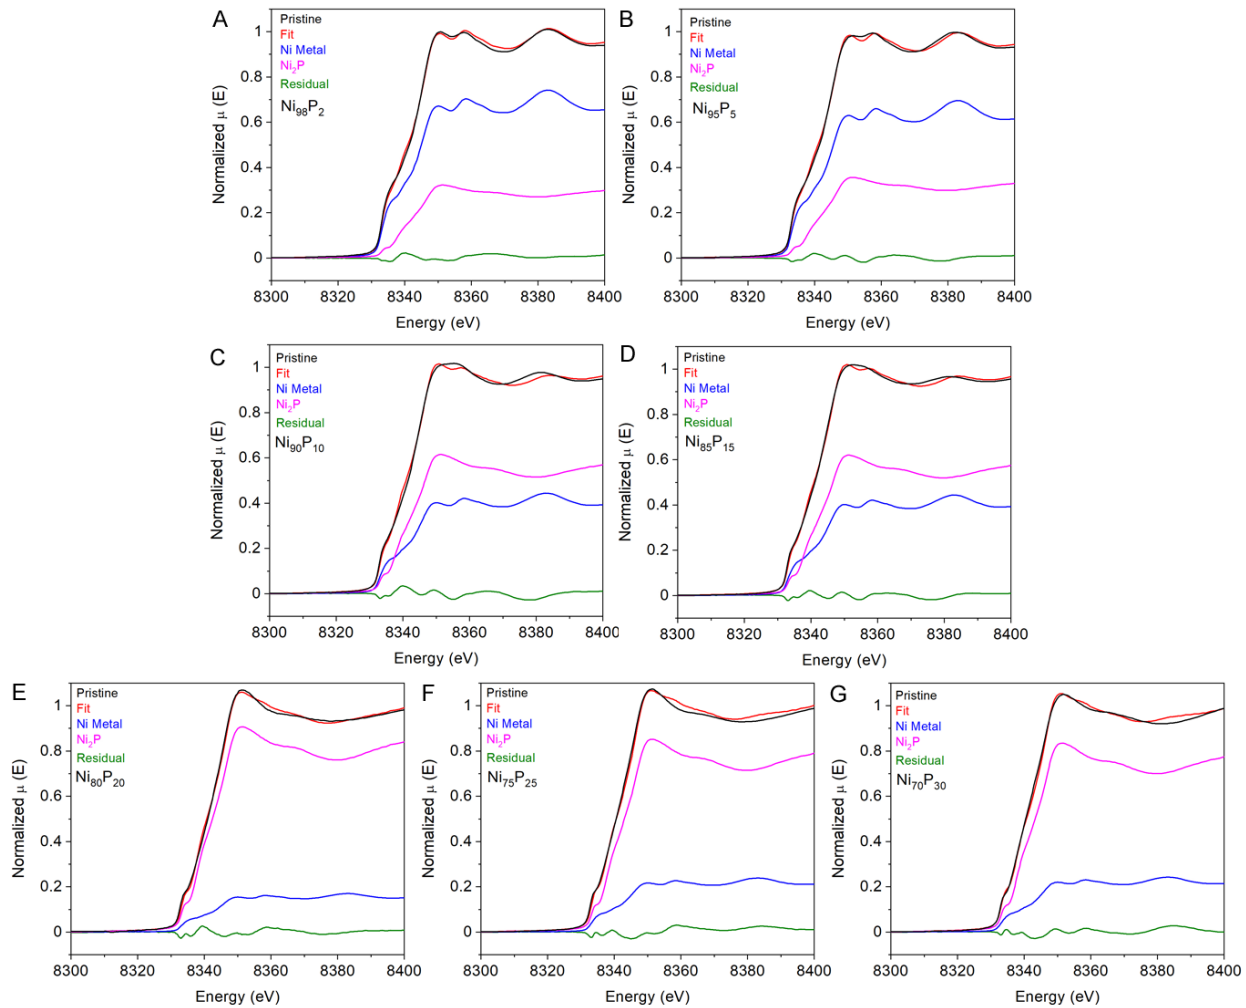

**Figure S1.** LCF analysis of amorphous  $\text{Ni}_x\text{P}_y$  with different compositions using the XAS of metallic Ni and  $\text{Ni}_2\text{P}$  data: (A)  $\text{Ni}_{98}\text{P}_2$ ; (B)  $\text{Ni}_{95}\text{P}_5$ ; (C)  $\text{Ni}_{90}\text{P}_{10}$ ; (D)  $\text{Ni}_{85}\text{P}_{15}$ ; (E)  $\text{Ni}_{80}\text{P}_{20}$ ; (F)  $\text{Ni}_{75}\text{P}_{25}$ ; and (G)  $\text{Ni}_{70}\text{P}_{30}$ .

**Table S3.** Summary of the percentages of Ni and P derived from the LCF analysis of the XANES data of the amorphous Ni<sub>x</sub>P<sub>y</sub> nanoparticles.

| Ni <sub>x</sub> P <sub>y</sub>   | Ni metal (%)<br>from LCF | Ni <sub>2</sub> P (%)<br>from LCF | Ni (%) <sup>a</sup> | P (%) <sup>b</sup> |
|----------------------------------|--------------------------|-----------------------------------|---------------------|--------------------|
| Ni <sub>98</sub> P <sub>2</sub>  | 71.5 ± 1.3               | 30.0 ± 1.2                        | 91.5                | 8.5                |
| Ni <sub>95</sub> P <sub>5</sub>  | 67.0 ± 1.3               | 33.2 ± 1.2                        | 89.1                | 10.9               |
| Ni <sub>90</sub> P <sub>10</sub> | 42.8 ± 1.9               | 57.3 ± 1.8                        | 81.0                | 19.0               |
| Ni <sub>85</sub> P <sub>15</sub> | 42.8 ± 1.4               | 57.8 ± 1.3                        | 81.3                | 18.7               |
| Ni <sub>80</sub> P <sub>20</sub> | 16.4 ± 1.8               | 84.5 ± 1.6                        | 72.8                | 27.2               |
| Ni <sub>75</sub> P <sub>25</sub> | 23.0 ± 2.1               | 79.4 ± 2.0                        | 76.0                | 24.0               |
| Ni <sub>70</sub> P <sub>30</sub> | 23.4 ± 1.6               | 77.8 ± 1.5                        | 75.3                | 24.7               |

<sup>a</sup>: The percentage of Ni is calculated from the LCF results using equation.

$$\text{Ni (\%)} = \text{Ni metal (\%)} + \text{Ni}_2\text{P (\%)} \times 2/3$$

<sup>b</sup>: The percentage of P is calculated using equation: P (%) = 100 – Ni (%).

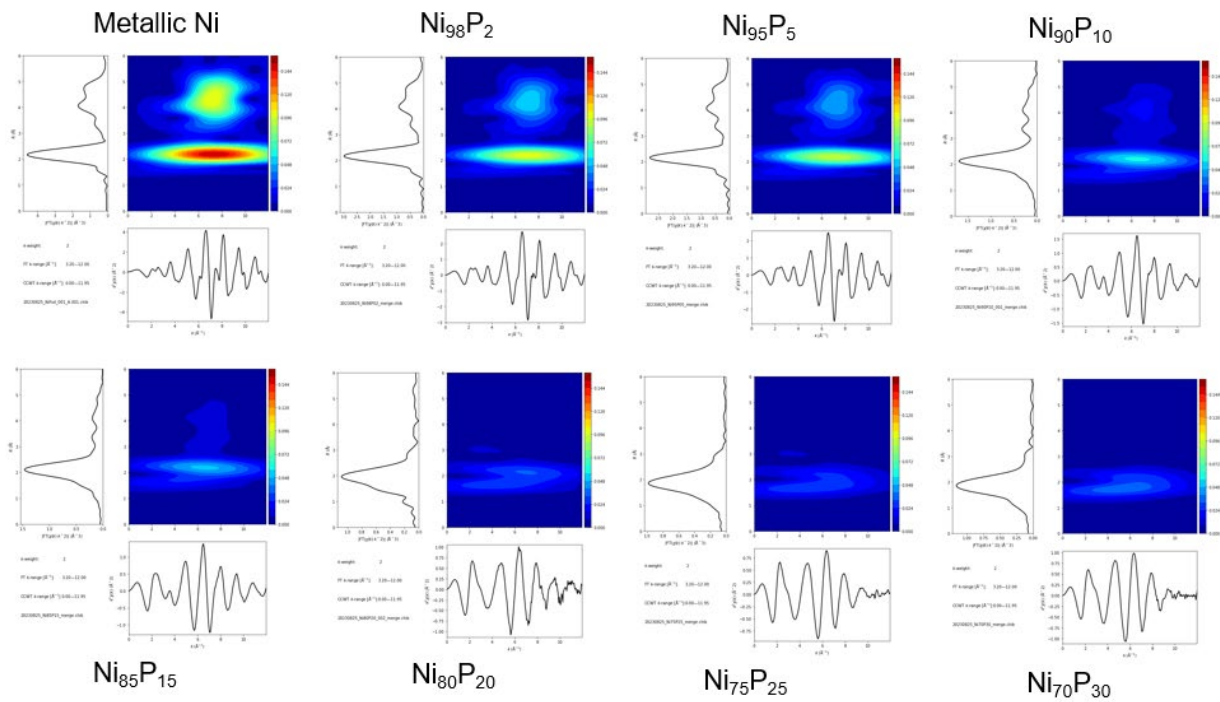

**Figure S2.** Continuous Cauchy wavelet transform of a  $k^2$ -weight in  $R$  space and  $k$ -range of 3.3-12 for the series of samples from metallic Ni to amorphous  $Ni_xP_y$  with different compositions. The intensity scale is the same for each data set.

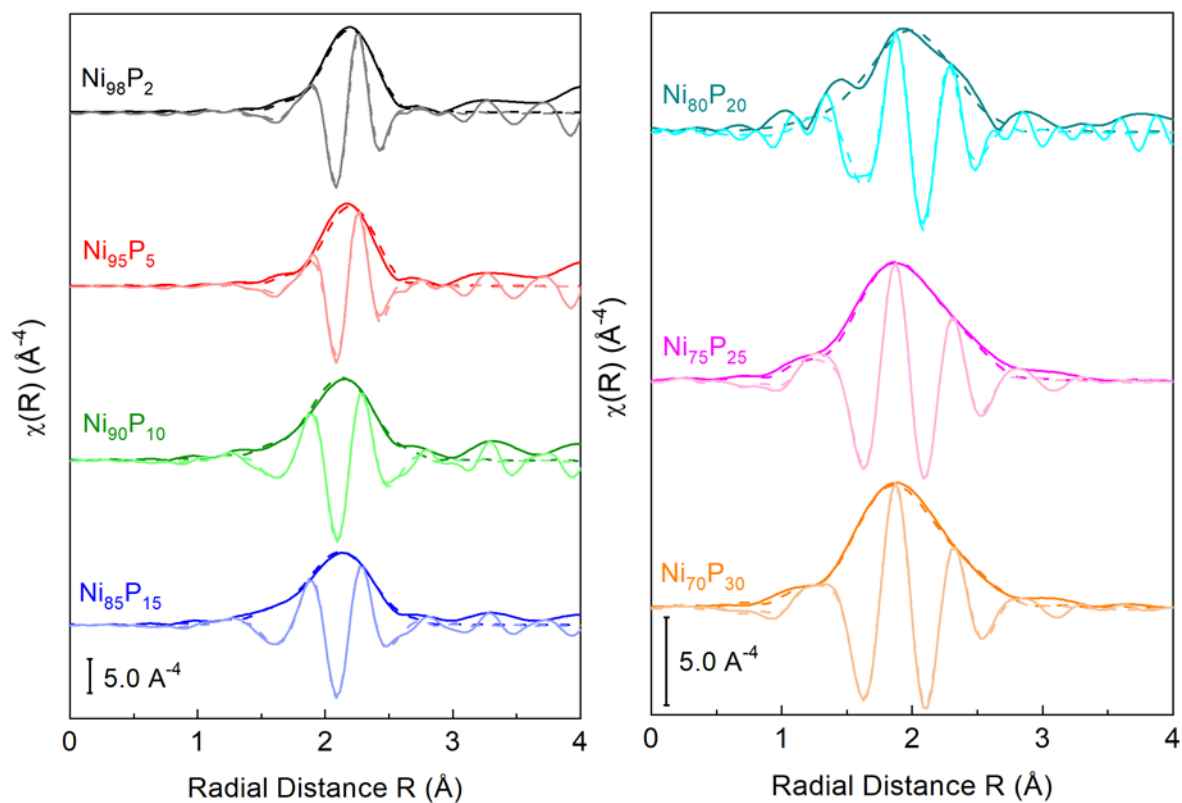

**Figure S3.** The real (brightly colored) and imaginary (faded color) components of the Ni K-edge EXAFS results for Ni<sub>98</sub>P<sub>2</sub> (black), Ni<sub>95</sub>P<sub>5</sub> (red), Ni<sub>90</sub>P<sub>10</sub> (green), Ni<sub>85</sub>P<sub>15</sub> (blue), Ni<sub>80</sub>P<sub>20</sub> (cyan), Ni<sub>75</sub>P<sub>25</sub> (magenta), Ni<sub>70</sub>P<sub>30</sub> (orange) with their corresponding fits (dashed lines).

**Table S4.** Ni K-edge EXAFS fit results for Ni<sub>x</sub>P<sub>y</sub> where x and y were the mol% of each sample derived from the ICP-MS results.

| Sample                           | Structure         | Scattering Path         | R(Å)      | CN      | $\sigma^2$  | E <sub>o</sub> (eV) | Reduced $\chi^2$ | R-factor |
|----------------------------------|-------------------|-------------------------|-----------|---------|-------------|---------------------|------------------|----------|
| Metallic Ni (Ref.)               |                   | <i>Ni-Ni</i>            | 2.49      | 12      |             |                     |                  |          |
| Ni <sub>2</sub> P (Ref.)         |                   | <i>Ni-P</i>             | 2.21      | 2       |             |                     |                  |          |
|                                  |                   | <i>Ni-Ni</i>            | 2.61      | 4       |             |                     |                  |          |
| Ni <sub>98</sub> P <sub>02</sub> | <i>fcc</i> Ni     | <i>Ni-Ni</i>            | 2.49±0.00 | 9.3±0.6 | 0.007±0.000 | 6.75±0.45           | 123.2            | 0.015    |
| TOP/Ni(acac) <sub>2</sub> : 0.5  |                   |                         |           |         |             |                     |                  |          |
| Rxn. time: 120 min               |                   |                         |           |         |             |                     |                  |          |
| Ni <sub>98</sub> P <sub>02</sub> | <i>fcc</i> Ni     | <i>Ni-Ni</i>            | 2.48±0.01 | 9.1±0.5 | 0.006±0.000 | 7.5±0.23            | 66014            | 0.011    |
|                                  | Ni <sub>2</sub> P | <i>Ni-Ni</i>            | 2.60±0.01 | 1.5±0.6 | 0.005±0.000 | -2.45±0.83          |                  |          |
|                                  | Ni <sub>2</sub> P | <i>Ni-P<sub>l</sub></i> | 2.21±0.00 | 0.4±0.3 | 0.007±0.001 | -2.45±0.83          |                  |          |
| Ni <sub>95</sub> P <sub>05</sub> | <i>fcc</i> Ni     | <i>Ni-Ni</i>            | 2.49±0.00 | 8.7±0.5 | 0.007±0.000 | 6.75±0.45           | 123.2            | 0.015    |
| TOP/Ni(acac) <sub>2</sub> : 2.5  |                   |                         |           |         |             |                     |                  |          |
| Rxn. time: 60 min                |                   |                         |           |         |             |                     |                  |          |
| Ni <sub>95</sub> P <sub>05</sub> | <i>fcc</i> Ni     | <i>Ni-Ni</i>            | 2.48±0.01 | 9.8±0.5 | 0.006±0.000 | 7.5±0.23            | 66014            | 0.011    |
|                                  | Ni <sub>2</sub> P | <i>Ni-Ni</i>            | 2.60±0.01 | 3.2±0.6 | 0.005±0.000 | -2.45±0.83          |                  |          |
|                                  | Ni <sub>2</sub> P | <i>Ni-P<sub>l</sub></i> | 2.21±0.00 | 0.3±0.2 | 0.007±0.001 | -2.45±0.83          |                  |          |
| Ni <sub>90</sub> P <sub>10</sub> | <i>fcc</i> Ni     | <i>Ni-Ni</i>            | 2.49±0.00 | 7.4±0.6 | 0.007±0.000 | 6.75±0.45           | 123.2            | 0.015    |
| TOP/Ni(acac) <sub>2</sub> : 5.5  | Ni <sub>2</sub> P | <i>Ni-Ni</i>            | 2.61±0.01 | 3.2±0.6 | 0.006±0.001 | -0.46±0.97          |                  | 0.015    |
| Rxn. time: 10 min                | Ni <sub>2</sub> P | <i>Ni-P<sub>l</sub></i> | 2.23±0.01 | 0.9±0.3 | 0.008±0.002 | -0.46±0.97          |                  | 0.015    |
| Ni <sub>85</sub> P <sub>15</sub> | <i>fcc</i> Ni     | <i>Ni-Ni</i>            | 2.49±0.00 | 6.2±0.4 | 0.007±0.000 | 6.75±0.45           | 123.2            | 0.015    |
| TOP/Ni(acac) <sub>2</sub> : 5.5  | Ni <sub>2</sub> P | <i>Ni-Ni</i>            | 2.61±0.01 | 2.5±0.5 | 0.006±0.001 | -0.46±0.97          |                  | 0.015    |
| Rxn. time: 30 min                | Ni <sub>2</sub> P | <i>Ni-P<sub>l</sub></i> | 2.23±0.01 | 1.2±0.2 | 0.008±0.002 | -0.46±0.97          |                  | 0.015    |
| Ni <sub>80</sub> P <sub>20</sub> | <i>fcc</i> Ni     | <i>Ni-Ni</i>            | 2.49±0.00 | 3.5±1.1 | 0.007±0.000 | 6.75±0.45           | 123.2            | 0.015    |
| TOP/Ni(acac) <sub>2</sub> : 5.5  | Ni <sub>2</sub> P | <i>Ni-Ni</i>            | 2.61±0.01 | 1.4±1.1 | 0.006±0.001 | -0.46±0.97          |                  | 0.015    |
| Rxn. time: 120 min               | Ni <sub>2</sub> P | <i>Ni-P<sub>l</sub></i> | 2.23±0.01 | 2.4±0.8 | 0.008±0.002 | -0.46±0.97          |                  | 0.015    |
| Ni <sub>75</sub> P <sub>25</sub> | <i>fcc</i> Ni     | <i>Ni-Ni</i>            | 2.49±0.00 | 2.9±0.3 | 0.007±0.000 | 6.75±0.45           | 123.2            | 0.015    |
| TOP/Ni(acac) <sub>2</sub> : 11   | Ni <sub>2</sub> P | <i>Ni-Ni</i>            | 2.61±0.01 | 1.8±0.3 | 0.006±0.001 | -0.46±0.97          |                  | 0.015    |
| Rxn. time: 10 min                | Ni <sub>2</sub> P | <i>Ni-P<sub>l</sub></i> | 2.23±0.01 | 2.5±0.3 | 0.008±0.002 | -0.46±0.97          |                  | 0.015    |
| Ni <sub>70</sub> P <sub>30</sub> | <i>fcc</i> Ni     | <i>Ni-Ni</i>            | 2.49±0.00 | 3.3±0.5 | 0.007±0.000 | 6.75±0.45           | 123.2            | 0.015    |
| TOP/Ni(acac) <sub>2</sub> : 11   | Ni <sub>2</sub> P | <i>Ni-Ni</i>            | 2.61±0.01 | 2.4±0.5 | 0.006±0.001 | -0.46±0.97          |                  | 0.015    |
| Rxn. time: 60 min                | Ni <sub>2</sub> P | <i>Ni-P<sub>l</sub></i> | 2.23±0.01 | 3.0±0.3 | 0.008±0.002 | -0.46±0.97          |                  | 0.015    |



**Table S5.** Ni K-edge EXAFS fit results for crystalline nickel phosphide nanoparticles and their comparison to the bulk crystalline structures.

| Sample                                         | Structure                       | Scattering Path | R(Å)      | CN       | $\sigma^2$  | $E_0$ (eV) | Reduced $\chi^2$ | R-factor |
|------------------------------------------------|---------------------------------|-----------------|-----------|----------|-------------|------------|------------------|----------|
| Ni <sub>12</sub> P <sub>5</sub> (ICSD# 108640) |                                 | <i>Ni-P</i>     | 2.22      | 1        |             |            |                  |          |
|                                                |                                 | <i>Ni-Ni</i>    | 2.54      | 3        |             |            |                  |          |
| Ni <sub>12</sub> P <sub>5</sub> nanoparticles  | Ni <sub>12</sub> P <sub>5</sub> | <i>Ni-P</i>     | 2.21±0.03 | 2.6±0.06 | 0.006±0.003 | -4.1±3.2   | 6549.3           | 0.038    |
|                                                |                                 | <i>Ni-Ni</i>    | 2.50±0.02 | 1.6±0.09 | 0.005±0.003 | -4.1±3.2   | 6549.3           | 0.038    |
| Ni <sub>2</sub> P (ICSD# 27162)                |                                 | <i>Ni-P</i>     | 2.21      | 2        |             |            |                  |          |
|                                                |                                 | <i>Ni-Ni</i>    | 2.61      | 4        |             |            |                  |          |
| Ni <sub>2</sub> P nanoparticles                | Ni <sub>2</sub> P               | <i>Ni-P</i>     | 2.24±0.02 | 2.2±0.5  | 0.007±0.002 | -2.9±1.8   | 7056.4           | 0.013    |
|                                                |                                 | <i>Ni-Ni</i>    | 2.60±0.01 | 3.1±0.7  | 0.006±0.001 | -2.9±1.8   | 7056.4           | 0.013    |
| Ni <sub>5</sub> P <sub>4</sub> (ICSD# 76671)   |                                 | <i>Ni-P</i>     | 2.30      | 2        |             |            |                  |          |
|                                                |                                 | <i>Ni-Ni</i>    | 2.65      | 4        |             |            |                  |          |
| Ni <sub>5</sub> P <sub>4</sub> nanoparticles   | Ni <sub>5</sub> P <sub>4</sub>  | <i>Ni-P</i>     | 2.29±0.01 | 3.8±0.7  | 0.006±0.001 | 1.9±1.4    | 3270.2           | 0.006    |
|                                                |                                 | <i>Ni-Ni</i>    | 2.58±0.01 | 5.2±1.6  | 0.001±0.003 | 1.9±1.4    | 3270.2           | 0.006    |

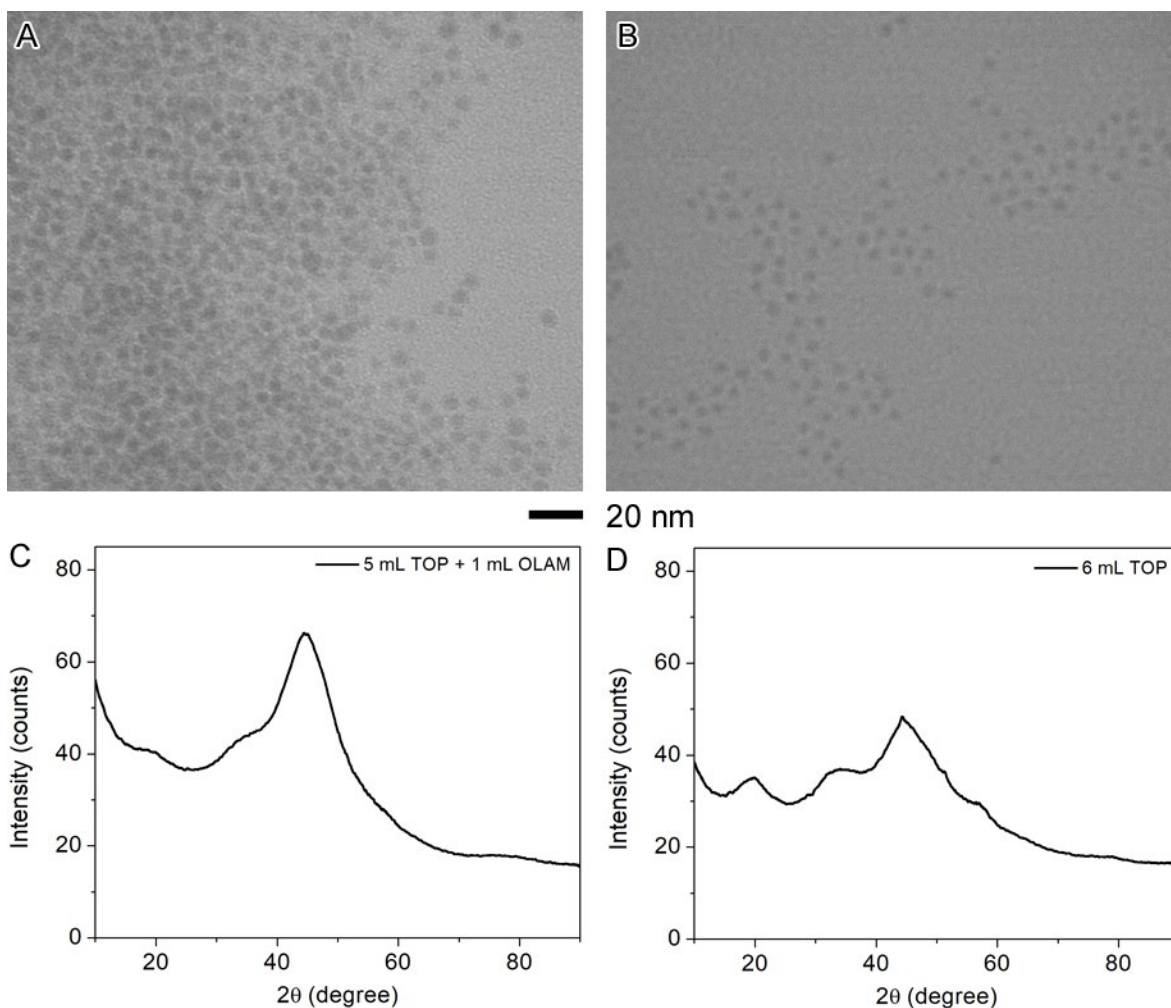

**Figure S4.** (A) TEM image of Ni<sub>69</sub>P<sub>31</sub> nanoparticles ( $5.0 \pm 1.0$  nm) synthesized at TOP/Ni(acac)<sub>2</sub> = 56 in 5 mL of TOP and 1 mL of OLAM; (B) TEM image of Ni<sub>69</sub>P<sub>31</sub> nanoparticles ( $3.8 \pm 0.6$  nm) synthesized at TOP/Ni(acac)<sub>2</sub> = 66 in 6 mL of TOP alone; (C) XRD pattern of the sample in (A); and (D) XRD pattern of the sample in (B). The elemental compositions of the samples were measured by ICP-MS.

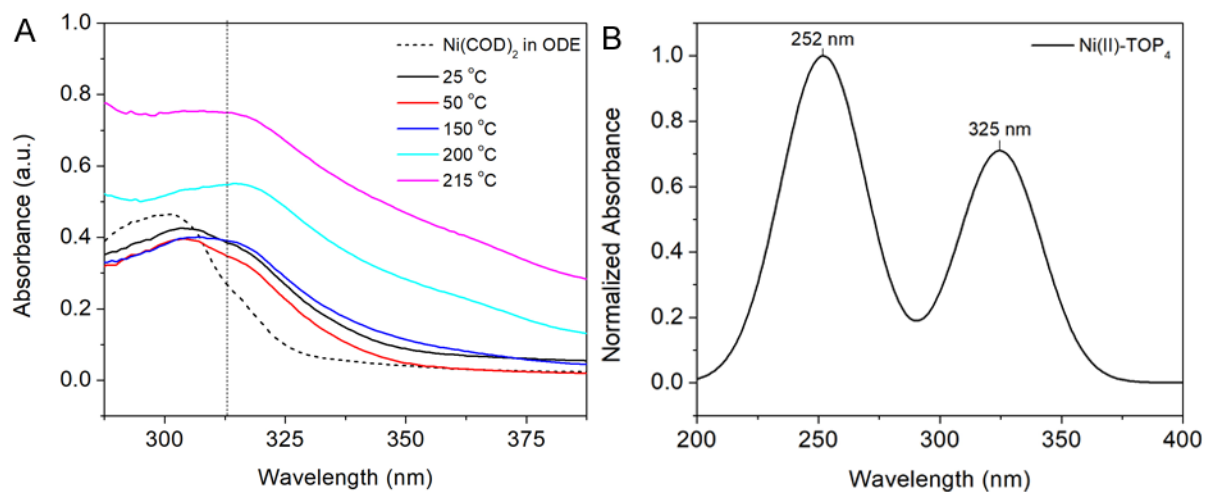

**Figure S5.** (A) UV-vis spectra of the aliquots taken from the reaction where 40 mg bis(1,5-cyclooctadiene)nickel(0) ( $\text{Ni}(\text{COD})_2$ ) was reacted with 6 mL of TOP under argon. For comparison, the UV-vis spectrum of  $\text{Ni}(\text{COD})_2$  ( $\lambda_{\text{max}} = 300 \text{ nm}$ ) before TOP was introduced is also provided (dashed line). (B) Calculated UV-vis spectrum of a tetrahedral  $\text{Ni}(\text{II})\text{-TOP}_4$  complex showing two peaks at 252 and 325 nm, respectively.
